# Supplementary material
Source: ML conference proceedings conference paper supplement (https://openreview.net/forum?id=CnvZ7FIyAD)
Supplement: supplementary_material [file attachment]

## 408 A The Derivations of NC (0) for Other EGNN Models

409 In this section, we first illustrate how the other two baseline models (i.e. RF [17] and GMN [19]) can  
410 be derived to NC (0), and then discuss multi-layer EGNN.

### 411 A.1 RF

412 The overall equivariant convolution process of RF is similar to that of EGNN. The main difference  
413 is that RF does not use the node feature. Instead, it leverages the L2 norm of the velocity as an  
414 additional feature to update the predicted velocity:

$$\hat{\mathbf{v}}_i^0 = \text{Norm}(\mathbf{v}_i^0) \left( \phi_v(\mathbf{h}_i) \mathbf{v}_i^0 + \frac{1}{N-1} \sum_{j \neq i} (\mathbf{x}_i^0 - \mathbf{x}_j^0) \mathbf{m}_{ij}^0 \right), \quad (19)$$

$$\hat{\mathbf{x}}_i^T = \mathbf{x}_i^0 + \hat{\mathbf{v}}_i^0 T, \quad (20)$$

415 where  $\text{Norm}(\mathbf{v}_i^0)$  denotes the L2 norm of the input velocity  $\mathbf{v}_i^0$ . Therefore, RF can be also viewed as  
416 a NC (0) model.

### 417 A.2 GMN

418 The main difference between GMN and EGNN is that GMN detects the sub-structures in the system  
419 and process the particles in each special sub-structure independently. Specifically, GMN re-formulates  
420 the original EGNN (i.e., Equations (2-4)) as follows:

$$\mathbf{m}_{ij}^0 = \phi_e(\mathbf{h}_i, \mathbf{h}_j, \|\mathbf{x}_i^0 - \mathbf{x}_j^0\|^2, e_{ij}), \quad (21)$$

$$\hat{\mathbf{v}}_k^0 = \phi_v \left( \sum_{i \in \mathcal{S}_k} \mathbf{h}_i \mathbf{v}_i^0 + \sum_{i \in \mathcal{S}_k} \phi_k(\mathbf{x}_i^0, \mathbf{m}_{ij}^0) \right), \quad (22)$$

$$\hat{\mathbf{v}}_i^0 = \text{FK}(\hat{\mathbf{v}}_k^0), \quad (23)$$

$$\hat{\mathbf{x}}_i^T = \mathbf{x}_i^0 + \hat{\mathbf{v}}_i^0 T, \quad (24)$$

421 where  $\hat{\mathbf{v}}_k^0$  is the predicted velocity of the sub-structure. GMN then uses it to calculate the velocity  
422 of each particle by a function FK which can be either learnable or based on the angles and relative  
423 positions in the sub-structure [19].

### 424 A.3 Multi-layer EGNN

425 In current EGNN methods, the input coordinate  $\mathbf{x}_i^0$  and velocity  $\mathbf{v}_i^0$  are regarded as constant feature  
426 and used in different layers. For example, in the multi-layer version EGNN,  $\mathbf{m}_{ij}^0$  will be formulated  
427 as follows:

$$\mathbf{m}_{ij}^{0,l} = \phi_e(\mathbf{h}_i^{l-1}, \mathbf{h}_j^{l-1}, \|\mathbf{x}_i^0 - \mathbf{x}_j^0\|^2, e_{ij}), \quad (25)$$

428 where  $\mathbf{m}_{ij}^{0,l}$  is  $\mathbf{m}_{ij}^0$  in layer  $l$  and  $\mathbf{h}_i^{l-1}$  denotes the hidden feature in layer  $l-1$ . Evidently, only the  
429 hidden features are updated within different layers. The overall formulation of multi-layer layer is  
430 akin to the single-layer EGNN.

## 431 B Proofs of Things

### 432 B.1 Proof of Proposition 3.1

433 *Proof.* The objective of the existing methods for a single system can be defined as:

$$\underset{\hat{\mathbf{v}}^0}{\operatorname{argmin}} \sum_{p_i} (\mathbf{x}_i^T - \hat{\mathbf{x}}_i^T) \quad (26)$$

$$= \sum_{p_i} (\mathbf{x}_i^T - \mathbf{x}_i^0 - \hat{\mathbf{v}}_i^0 T) \quad (27)$$

$$= \sum_{p_i} T \left( \frac{\mathbf{x}_i^T - \mathbf{x}_i^0}{T} - \hat{\mathbf{v}}_i^0 \right) \quad (28)$$

$$= T \sum_{p_i} \left( \mathbf{v}_i^{t^*} - (\phi_v(\mathbf{h}_i) \mathbf{v}_i^0 + \frac{\sum_{j \neq i} (\mathbf{x}_i^0 - \mathbf{x}_j^0) \mathbf{m}_{ij}^0}{N-1}) \right) \quad (29)$$

$$= T \sum_{p_i} \left( \mathbf{v}_i^{t^*} - (w^0 \mathbf{v}_i^0 + \mathbf{b}^0) \right), \quad (30)$$

434 where  $w^0 \in \mathbb{R}^1$  and  $\mathbf{b}^0 \in \mathbb{R}^3$  denote the learnable variables irrelevant to  $\mathbf{v}_i^0$  and  $t$ , concluding the  
435 proof.  $\square$

### 436 B.2 Proof of Proposition 3.3

437 *Proof.* As the higher order cases ( $k \geq 1$ ) have already been proved, we only need to show that  
438  $\epsilon_{\text{NC}(0)} \geq \epsilon_{\text{NC}(1)}$ . The first order of Newton-Cotes formula NC (1) is also known as Trapezoidal rule,  
439 i.e.:

$$\int_0^T \mathbf{v}(t) dt \approx \frac{T}{2} (\mathbf{v}^0 + \mathbf{v}^T). \quad (31)$$

440 As aforementioned, the actual integration  $\mathbf{x}^T - \mathbf{x}^0$  for different training examples is different, and we  
441 assume that it fluctuates around the base estimation  $\frac{T}{2} (\mathbf{v}^0 + \mathbf{v}^T)$  and follows a normal distribution  
442  $\mathcal{N}_{\text{NC}(1)}$ , where the variance  $\sigma_{\text{NC}(1)}^2$  is positively correlated with the difficulty of optimizing the  
443 overall objective. The variance of  $\mathcal{N}_{\text{NC}(1)}$  is:

$$\sigma_{\text{NC}(1)}^2 = \frac{\sum_p (\int_0^T (\mathbf{v}(t) - \sum_{k=0}^1 C^k t^{(k)}) dt)^2}{NT^2}, \quad (32)$$

444 where the integration term is a general form of polynomial interpolation error. According to Equa-  
445 tion 14, it can be derived to:

$$\int_0^T \left( \frac{(t-t^0)(t-t^1) \mathbf{v}''(\xi)}{2!} \right) dt, \quad (33)$$

446 where  $\mathbf{v}''$  denote the second derivative of  $\mathbf{v}$ . Let  $s = \frac{t-t^0}{T}$ , then  $t = t^0 + sh$  and  $dt = d(\mathbf{v}^0 + sh) =$   
447  $Tds$ . the above equation can be re-written as:

$$T \int_0^1 \frac{s(s-1)T^2 \mathbf{v}''(\xi)}{2} ds = -\frac{1}{12} T^3 \mathbf{v}''(\xi) = \mathcal{O}(T^3). \quad (34)$$

448 Therefore, the final  $\sigma_{\text{NC}(1)}^2$  is:

$$\sigma_{\text{NC}(1)}^2 = \frac{\sum_p \left( -\frac{1}{12} T^3 \mathbf{v}''(\xi) \right)^2}{NT^2} \quad (35)$$

$$= \mathcal{O}(T^4) \leq \mathcal{O}(T^2) = \sigma_{\text{NC}(0)}^2, \quad (36)$$

449 concluding the proof.  $\square$

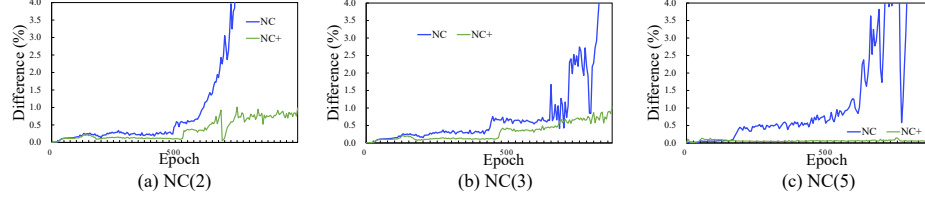

Figure 6: The prediction errors of intermediate velocities on MD17 dataset, w.r.t. training epoch. The blue and green lines denote the prediction errors of NC and NC<sup>+</sup>, respectively.

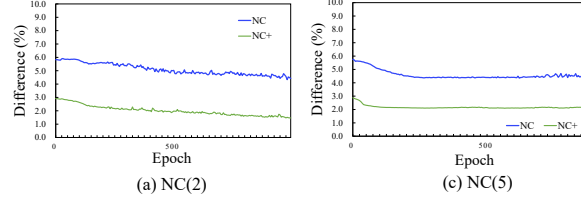

Figure 7: The prediction errors of intermediate velocities on N-body dataset, w.r.t. training epoch. The blue and green lines denote the prediction errors of NC and NC<sup>+</sup>, respectively.

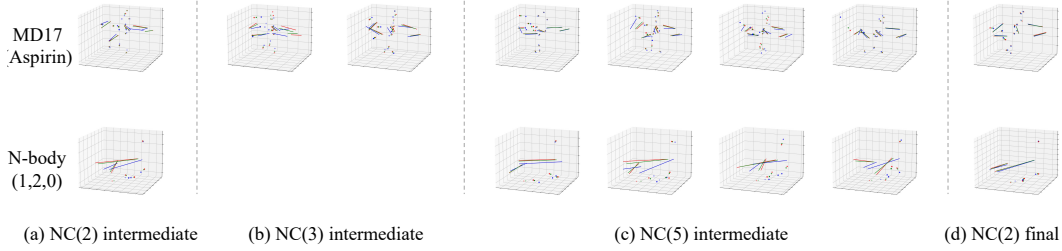

Figure 8: Visualization of the intermediate velocities w.r.t.  $k$ . The red, blue, and green lines denote the target, prediction of NC, and prediction of NC<sup>+</sup>, respectively.

### 450 B.3 Proof of Proposition 3.4

451 *Proof.* The GNN models possessing equivariance property are equivariant to the translation, rotation,  
 452 and permutation of input. NC directly feeds the input into these backbone models and naturally  
 453 possesses this property.

454 Formally, let  $T_g : \mathbf{x} \rightarrow \mathbf{x}$  be a group of transformation operations. If the backbone model  $\mathcal{M}$  is  
 455 equivariant then we will have:

$$\mathcal{M}(T_g(\mathbf{x})) = S_g(\mathcal{M}(\mathbf{x})), \quad (37)$$

456 where  $S_g$  is an equivalent transformation to  $T_g$  on the output space. NC can be regarded as a weighted  
 457 combination of the outputs of  $\mathcal{M}$ :

$$\sum_i w_i \mathcal{M}(T_g(\mathbf{x}_i)) = \sum_i w_i S_g(\mathcal{M}(\mathbf{x}_i)), \quad (38)$$

458 where the Newton-Cotes weights  $w_i$  is constant and irrelevant to the input, the output, and the model  
 459  $\mathcal{M}$  itself. Therefore, the above equation will always holds.  $\square$

## 460 C Additional Experimental Results

461 The average intermediate velocity prediction errors on MD17 and Motion datasets are shown in  
 462 Figure 6 and Figure 7, respectively. NC still learned the intermediate velocities we did not feed  
 463 the intermediate into it. Particularly, the error on N-body dataset was small and stable, which may  
 464 demonstrate the effectiveness of estimating intermediate velocities even without supervised data.

Table 4: Hyper-parameter settings in the main experiments.

| Datasets | # steps | velocity<br>regularization | velocity<br>regularization<br>decay | parameter<br>regularization | parameter<br>regularization<br>decay | loss<br>criterion | input<br>feature<br>normalization | intermediate<br>velocity<br>normalization |
|----------|---------|----------------------------|-------------------------------------|-----------------------------|--------------------------------------|-------------------|-----------------------------------|-------------------------------------------|
| N-body   | 2       | 0.001                      | 0.999                               | 1.0                         | 0.99                                 | MSE               | False                             | True                                      |
| MD17     | 2       | 0.1                        | 0.999                               | 1.0                         | 0.95                                 | MSE               | True                              | True                                      |
| Motion   | 2       | 0.01                       | 0.999                               | 1.0                         | 0.95                                 | MSE               | True                              | True                                      |

---

|        | # epoch | batch-size | # training<br>examples | activation | # layers | learning<br>rate | optimizer | clip<br>gradient<br>norm |
|--------|---------|------------|------------------------|------------|----------|------------------|-----------|--------------------------|
| N-body | 1,500   | 200        | 500                    | ReLU       | 4        | 0.0005           | Adam      | 1.0                      |
| MD17   | 1,000   | 100        | 500                    | ReLU       | 4        | 0.001            | Adam      | 0.1                      |
| Motion | 1,500   | 100        | 200                    | ReLU       | 4        | 0.0005           | Adam      | 1.0                      |

We also provide some visualized examples on these two datasets in Figure 8, from which we can observe the similar results compared with Figure 4 in the main paper.

## D Hyper-parameter Setting

We list the main hyper-parameter setting of NC with different EGNN models on different datasets in Table 4. We used the Adam optimizer [47] and adopted layer normalization [48] and ReLU activation [49]) for all settings. For a fair comparison, the parameter settings for the backbone EGNN models were identical to these in the existing implementation [19].
